# Supplementary material for: Promotion of physical activity interventions for community dwelling older adults: A systematic review of reviews
Source: PLoS One. 2017 Jul 10;12(7):e0180902. doi: 10.1371/journal.pone.0180902 (PMC5507305; doi:10.1371/journal.pone.0180902)
Supplement: S1 Table — (XLSX) [file pone.0180902.s002.xlsx]

## Sheet: overview of reviews
Overview of the 19 included reviews
Review & year	Aim	Studies & Participants	Type of review	Outcomes of interest (studies and timing)	Authors' conclusions
Arbesman 2012	To evaluate the evidence for the effect of occupation and activity-based health management and maintenance interventions on the performance of community-dwelling older adults	• 28 studies (17 RCTs, 4 quasi-experimental, 4 systematic reviews, 3 meta-analyses) • 12,556 participants in RCTs	descriptive	• PA outcomes - PA levels (4 studies: 2, 9, 12, 12mo) • psychological outcomes - quality of life (2 studies: 6, 12mo) - depressive symptoms (2 studies: 6, 12mo) - self-efficacy (6 studies: 6mo, 3 x 12mo, 2 x 24mo) • participation and adherence (12mo)	• There is moderate evidence that health education programs increase PA and that individualized health action plans improve participation in PA. • There is moderate evidence that incorporating cognitive–behavioral principles in PA improves longterm participation in exercise.
Baxter 2016	To synthesise international evidence on the types and effectiveness of interventions to increase physical activity among people around the time of retirement	• 63 studies? (50 RCTs, 8 quasi-experimental, 3 cohort, 2 other) • at least 59,042 participants	descriptive	• PA outcomes - PA levels objective: activity, fitness, bio-physical - PA levels self-reported: activity, fitness, psychosocial correlates, health correlates	• The majority of papers reported some intervention effect, with evidence of positive outcomes for all types of programmes, including group-based, homebased, behavioural/activity and/or educational/cognitive components. There may be differences in longer term effectiveness between components. • Little research has been conducted to assess whether PA interventions at the time of retirement may be …
Chase 2015	To determine the overall effectiveness of interventions designed to increase physical activity behavior among community-dwelling older adults	• 79 studies (type not reported) • 13,829 participants	descriptive + meta-analyses	• PA outcomes - PA levels self-reported: questionnaires, activity logs) - PA levels objective: pedometers, accelometers - particularly steps per day (used for meta-analyses)	• PA interventions significantly improved PA behaviour among community dwelling older adults. • PA interventions tested among healthier subjects had larger effects relating to increase in PA than those tested among chronically ill populations. • Significant moderators included: the use of theory, interventions delivered via audio-visual or mailed materials, cognitive plus behavioral-type interven…
Conn 2002	To apply meta-analytic procedures to integrate primary research findings that test interventions to increase activity among aging adults	• 43 studies (18 RCTs?, 25 quasi-experimental) • 33,090 participants	descriptive + meta-analyses	• PA outcomes (activity duration per session, frequency of exercise sessions per week, activity intensity - minutes of contact between research interventionists and participants)	• Aging adults’ PA behavior is amenable to intervention. • Effect sizes were larger for patient populations. Interventions delivered in centre-based groups were more effective than home based interventions. • The findings suggest that general health education should be a secondary concern in designing interventions to increase activity, while dveloping the motivation components seems more importa…
Conn 2003	To conduct a broad integrative review on studies that tested interventions attempting to increase general physical activity or aerobic exercise by aging adults	•17 RCTs • 6,391 participants	descriptive	• PA outcomes - walking time: walking logs, self-reported walking times (5 studies: 2 x 3mo, 9wk, 6mo, 12mo) - PA levels: 7-day PA Recall, exercise frequency/duration/intensity, CHAMPS measure, PA Scale for the Elderly, heart rate monitors, exercise log (6 studies: 3mo, 48mo, 2 x 12mo, 2 x 6mo)	• The studies that reported significant increases in PA (10/17) confirm that some older adults are able to increase their activity levels. • No single intervention component or attribute reported by large numbers of studies dramatically or consistently produced successful outcomes. (Components tested included: setting, group/individual delivery, individualised interventions) • 4/6 walking-focused…
Foster 2013 (Cochrane)	To compare the effectiveness of remote and web 2.0 interventions for PA promotion in community dwelling adults (aged 16 years and above) with a control group exposed to placebo or no or minimal intervention	• 11 RCTs • 5,862 participants	descriptive + meta-analyses	• PA outcomes - PA levels self-reported: continuous measure (9 studies: 12mo), e.g. estimated energy expenditure, total time of PA, mean number of occasions of PA; dichotomous outcome variable (1 study: 24mo) • psychological outcomes - quality of life (5 studies: 12mo)	• There is consistent high quality evidence to support the effectiveness of remote and web 2.0 interventions for promoting PA for older adults, but it remains unclear what elements were most effective. • The most effective interventions applied a tailored approach to the type of PA and used telephone ongoing contact to provide feedback and to support changes in PA levels. It remains unclear wheth…
French 2014	To identify behaviour change techniques (BCTs) that increase self-efficacy and physical activity behaviour in non-clinical community dwelling adults 60 years or over	• 25 studies (20 RCTs, 5 quasi-experimental) • total number of participants not reported (5 to 1011 paricipants in individual studies)	descriptive + meta-analyses	• PA outcomes - PA levels: 3 BCTs were associated with higher effect sizes, 10 BCTs were associated with lower effect sizes • psychological outcomes - self-efficacy: 6 BCTs were associated with higher effect sizes, 11 BCTs were associated with lower effect sizes	• The interventions had a small-sized effect on PA. • Caution is needed in applying BCTs that are generally effective at increasing PA in younger and middle-aged adults to older adults, especially those involving planning or other forms of self-regulation. • There is a need for more research on what exactly older adults want from PA interventions (perhaps not the instrumental benefits of PA per s…
Geraedts 2013	To evaluate the literature on effectiveness of remote feedback on physical activity and capacity (and adherence) in home-based physical activity interventions for older adults with or without medical conditions	• 32 studies (22 RCTs, 10 quasi-experimental) • 5,211 participants	descriptive	• PA outcomes - walking speed and distance (3 studies: 8wk, 12wk, 24wk) - PA levels self-reported (1 study: 12mo) • compliance and adherence (21 studies: between 53 and 91%)	• Results imply with varying strength that interventions using frequent, non-frequent or direct (during exercise) remote feedback seem more effective than treatment as usual and equally effective as supervised exercise interventions without feedback. Direct remote contact seems a particularly good alternative to supervised onsite exercising. • Adherence to interventions using remote feedback seem…
Hobbs 2013	To evaluate the evidence for the long-term effect (≥ 12 months) of interventions to promote physical activity in adults aged 55 to 70 years	• 21 RCTs • 10,519 participants	descriptive + meta-analyses	• PA outcomes - PA levels objective: pedometer (5 studies: 12, 18, 24mo), accelometer (1 study: 12mo) - PA levels self-reported: minutes of PA or energy expenditure (20 studies: 12, 18, 24 mo)	• Interventions led to long term improvements in PA at 12 months; however, maintenance beyond this is unclear. Substantial effect was identified on walking. • Evidence suggests that mode of delivery or intensity (number of intervention contacts) of interventions are not necessarily important for effectiveness but that tailoring the intervention to participants with personalized stepcount goals or…
Kassavou 2013	To assess the efficacy of interventions to promote walking in groups to promoting physical activity within adults, and to explore potential moderators of this efficacy	• 19 studies (9 RCTs, 10 quasi-experimental) • 4,572 participants	descriptive + meta-analyses	• PA outcomes - PA levels objective: pedometer (7 studies: 10wk, 3, 6, 12, 18, 24mo) - PA levels self-reported (15 studies: ranging from 7wk to 24mo)	• The effect of the interventions on PA was of a medium size. • The findings of the present review support the idea that walking interventions which provide social support relationships for behaviour change may lead to greater maintenance of behaviour change. • Moderator analyses showed that certain study components had larger effect sizes: outcomes over six months (as opposed to outcomes up to s…
King 1998	To provide a critical selected review of the scientific literature focusing on interventions to promote physical activity among older adults	• 29 studies (26 RCTs, 3 quasi-experimental) • 3,968 participants	descriptive	• PA outcomes - PA levels self-reported (10 studies: 16, 26wk, 6, 12, 18, 24mo) • psychological outcomes - self-efficacy (1 study: 6mo) - quality of life (2 studies: 6mo) • participation / adherence (19 studies: from 36 to 98%, mean 75%, ranging between 6-12mo)	• Participation rates were high and higher than in groups of younger adults. • Effective interventions included those that employed behavioral or cognitive-behavioral strategies as opposed to health education or instruction alone. The majority utilized a combination of tools, e.g. goal-setting, self-monitoring, feedback, support, relapse-prevention training. • Programs that also used either a sup…
Moore 2016	To assess the characteristics and effectiveness of community-based interventions designed to increase physical activity participation in older adults (aged 65 years or more) living in rural or regional areas	• 7 studies (3 RCTs, 3 quasi-experimental, 1 population study) • 3,354 participants (data from one study missing)	descriptive	• PA outcomes - PA levels objective: accelerometer (1 study: 11wk) • psychological outcomes - self-efficacy (1 study: 12mo) - quality of life (1 study: 10wk) - mental outlook (1 study: 12mo) - depression (1 study: 12mo)	• Results provide some evidence to support the effectiveness of community-based interventions that include low- to moderate-intensity exercise to increase PA, physical function, and psychological state. However, findings across studies were inconsistent. • Available evidence indicates that interventions which are tailored, promote low- to moderate- intensity activity, and incorporate personal con…
Müller 2014	To summarize the scientific literature on non-face-to-face physical activity interventions targeting healthy, community dwelling older adults aged 50 and over	• 16 studies (11 RCTs, 5 quasi-experimental) • 9,183 participants	descriptive	• PA outcomes - PA levels self-reported: CHAMPS, weekly time spent in PA or walking and/or weekly energy expenditure (18 studies: ranging from 1wk to 24mo)	• 14/16 studies reported significant increase in PA. 8/9 studies that conducted post-intervention follow-up analysis found that PA was maintained over a longer time. • A theoretical framework seems to be an essential interventional element for PA interventions in older adults. Tailoring was found to increase the likelihood of successful health interventions because it increases the perception of …
O'Brien 2015	To synthesise evidence for long-term effects of PA interventions in adults aged 55–70 years: (1) to identify the concurrence and potential inter-relationships between intervention features (modes of delivery and BCTs); (2) to explore associations between intervention features and intervention effectiveness	• 19 RCTs • 10,423 participants	descriptive + meta-analyses	• PA outcomes - PA duration as dichotomous measure (n=3) and continuous measure (n=16) (19 studies: 12, 18, 24, 36mo)	• The long-term effectiveness of PA interventions in middle- to older-aged adults was not associated with the total number of BCTs or the number of self-regulatory BCTs used. • Many pairs of intervention features were used in concurrence making it difficult to isolate the effects of specific BCTs unambiguously. Moderator analyses suggested that the BCT 'feedback' may be potentially effective cand…
Oliveira 2017	To investigate the effect of health coaching on physical activity, mobility, quality of life and mood among people aged 60 years and older	• 27 RCTs • 5,803 participants (mobility: 2051; quality of life: 1923; mood: 769)	descriptive + meta-analyses	• PA outcomes (n=27) - PA levels objective: pedometer, accelerometer - PA levels self-reported: CHAMPS (n=4) • quality of life: SF-36, RAND 36, PDQ-39, AQoL (n=8) • mood: BDI, BSI, GDS, HADS (n=5)	• Health coaching was effective in improving physical activity participation in older people. • Although both face-to-face and telephone-based health coaching were effective, greater effects were seen from interventions delivered face to face compared with telephone-based methods. • No effect was observed on quality of life, mobility and mood - different approaches to health coaching or other int…
Ostrander 2014	To determine whether any evidence-based methods of delivery or particular content for targeted messaging exist that result in actual improvements in physical activity of older adults	• 7 studies (6 RCTs?, 1 quasi-experimental) • 2,774 participants (1,971 in one study)	descriptive	• PA outcomes - PA levels objective: pedometer (3 studies: 12wk, 12mo) - PA levels self-reported (3 studies: 8wk, 12mo) • psychological outcomes - self-efficacy (1 study: 12wk)	• Messaging directed toward older adults to be physically active resulted in improvements in PA up to 1 year. Many different modes of message delivery were shown to be effective, including mobile devices. • It may be important to tailor the message to fit the older adult’s local environment and access for PA (e.g. maps of local walking or cycling routes, exercises that could be done at home, info…
Stevens 2013	To review the effectiveness of physical activity interventions for adults aged 50 and above delivered through general practice	• 6 RCTs • 1,522 participants	descriptive	• PA outcomes - PA levels self-reported: PASE, Auckland Heart Exercise Questionnaire (6, 9, 12mo) • psychological outcomes: - quality of life: SF-36 (3 studies: 6, 12mo) - self-efficacy (12mo)	• There is some evidence of the effectiveness of PA promotion for older adults through general practice, but not enough to warrant widespread commissioning and implementation. Large scale developmental projects with long follow up (beyond two years), objective measures of PA and comprehensive documentation of resource use, should now be conducted.
Van der Bij 2002	To evaluate the effectiveness of physical activity interventions among older adults, with respect to: 1) participation and changes in PA, 2) maintenance of participation. To explore what features of interventions were associated with achieving high participation and maintenance of physical activity levels	• 38 RCTs • 16,376 participants	descriptive	• PA outcomes - PA levels (12, 18, 26, 48mo, 10yr) • participation (ranged from 36 to 100%, mean 72%)	• Both group-based interventions and education interventions were effective in increasing PA levels in the short-term. • Participation rates of home-based and group-based interventions were comparable, and both seemed to be unrelated to type or frequency of PA. The beneficial effect of behavioral reinforcement strategies was not evident. • Comparative studies evaluating the effectiveness of diver…
Van der Deijl 2014	To determine participation levels of PA programs aimed to improve PA among community-dwelling older adults aged 55 years and older. To investigate what program characteristics and characteristics of participants distinct PA programs with higher participation levels from PA programs with lower participation levels	• 16 studies (type not reported) • 2,948 participants	descriptive	• PA outcomes - PA levels (all studies) • participation: initial (between 1 and 16%, mean 9.2%), sustained /PA programme completion (between 50 and 100%, mean 79.8%)	• No significant correlations were found for participant or program characteristics with sustained participation level. Understanding how to optimize initial participation of older adults in PA programs deserves more attention in order to improve the population impact of PA programs for community-dwelling older adults. • Higher sustained participation levels seemed to be related to lower mean age…
